# Supplementary material for: Enhanced blue TADF in a D–A–D type naphthyridine derivative with an asymmetric carbazole-donor motif
Source: Royal Society of Chemistry journal article supplement (doi:10.1039/d1tc05061c), 2021-12-29
Supplement: d1tc05061c1.pdf [file d1tc05061c1.pdf]

## Electronic supplementary information

### Enhanced blue TADF in D-A-D type naphthyridine derivative with asymmetric carbazole-donor motif

Dovydas Banevičius<sup>a</sup>, Gediminas Kreiza<sup>a</sup>, Rokas Klioštoraitis<sup>a</sup>, Saulius Juršėnas<sup>a</sup>, Tomas Javorskis<sup>b</sup>, Vytenis Vaitkevičius<sup>b</sup>, Edvinas Orentas<sup>b</sup>, Karolis Kazlauskas<sup>\*a</sup>  
E-mail: [karolis.kazlauskas@ff.vu.lt](mailto:karolis.kazlauskas@ff.vu.lt)

<sup>a</sup>*Institute of Photonics and Nanotechnology, Vilnius University, Saulėtekio av. 3, LT-10257 Vilnius, Lithuania*

<sup>b</sup>*Department of Organic Chemistry, Vilnius University, Faculty of Chemistry and Geosciences, Naugarduko 24, Vilnius LT-03225, Lithuania*

## Synthesis and identification

All reagents and starting materials were obtained from commercial sources and used as received. Reaction solvents, dimethylformamide was distilled from CaH<sub>2</sub>, THF was distilled from sodium/ benzophenone. All moisture-sensitive reactions were performed in oven-dried (230 °C) glassware under an atmosphere of dry argon. Thin-layer chromatography was performed on Merck silica gel plates with QF-254 indicator. Visualization was accomplished with UV (254 nm). Column chromatography was performed using Merck silica 60 (40–63 μm particle size). <sup>1</sup>H and <sup>13</sup>C NMR spectra were recorded on a NMR spectrometer at 400 MHz for <sup>1</sup>H and 101 MHz for <sup>13</sup>C, respectively. <sup>1</sup>H and <sup>13</sup>C NMR spectra are referenced to residual solvent (CDCl<sub>3</sub>, 7.29 and 77.16 ppm for <sup>1</sup>H NMR and <sup>13</sup>C NMR, respectively). Chemical shifts are reported in ppm, and multiplicities are indicated by s (singlet), d (doublet), m (multiplet), and combinations thereof. HRMS was recorded on Bruker Daltonics microTOF-II spectrometer equipped with ESI ion source in positive mode or Bruker Autoflex speed MALDI TOF spectrometer.

3,3',6,6'-tetra-*tert*-butyl-9*H*-1,9'-bicarbazole **2** [1] and 2,7-dichloro-1,8-naphthyridine **3** [2] were synthesized according to literature.

Abbreviations: AcOH, acetic acid; n-BuLi, n-butyllithium; DCM, dichloromethane; DMF, dimethylformamide; dppp, 1,3-bis(diphenylphosphino)propane; EtOAc, ethyl acetate; PE, petrol ether (40–60 °C fraction); PhCl, chlorobenzene; THF, tetrahydrofuran.

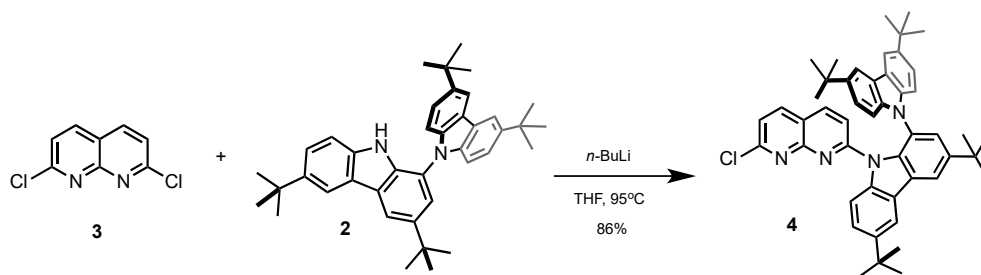

**Compound 4.** To a solution of 3,3',6,6'-tetra-*tert*-butyl-9*H*-1,9'-bicarbazole **2** (315 mg, 0.566 mmol, 2.1 equiv.) in dry THF (10 ml) *n*-BuLi (0.226 ml, 2.5 M, 2.1 equiv.) was added dropwise at -78°C. The reaction mixture was left to stir for 2h at r.t. before adding 2,7-dichloro-1,8-naphthyridine **3** (53 mg, 0.269 mmol, 1.0 equiv.) in one portion. The vial was screw-capped and heated at 95°C. After 96 h, the mixture was cooled to r.t., diluted with water and extracted with EtOAc. Purification by column chromatography on silica gel using gradient eluent system DCM/PE (1:6 to 2:1) afforded 165 mg (86%) of **4** as a light-yellow solid.

$R_f = 0.6$  (1/10 EtOAc:PE).

**$^1\text{H NMR}$**  (400 MHz,  $\text{CDCl}_3$ )  $\delta = 8.24$  (dd,  $J=28.4$ , 1.9, 2H), 7.91 (d,  $J=8.7$ , 1H), 7.72 – 7.65 (m, 3H), 7.50 (dd,  $J=8.8$ , 2.0, 1H), 7.33 (d,  $J=8.3$ , 2H), 7.26 (s, 1H), 7.12 (d,  $J=8.7$ , 2H), 6.77 – 6.66 (m, 1H), 6.50 (d,  $J=8.4$ , 1H), 1.53 (s, 9H), 1.49 (s, 9H), 1.35 (s, 18H).

**$^{13}\text{C NMR}$**  (101 MHz,  $\text{CDCl}_3$ )  $\delta$  153.50, 153.31, 153.15, 145.36, 144.94, 142.66, 139.23, 138.03, 138.00, 135.22, 132.98, 129.49, 128.05, 124.98, 124.50, 123.97, 123.59, 123.23, 122.85, 122.33, 121.47, 119.26, 118.66, 116.18, 115.86, 115.03, 111.93, 109.56, 109.51, 34.98, 34.84, 34.56, 31.98, 31.96, 31.94, 31.92, 29.72, 29.00, 22.99, 14.15.

**MS** (MALDI-TOF) calc. for  $\text{C}_{48}\text{H}_{51}\text{ClN}_4$  (M): 718.38; Found: 718.39.

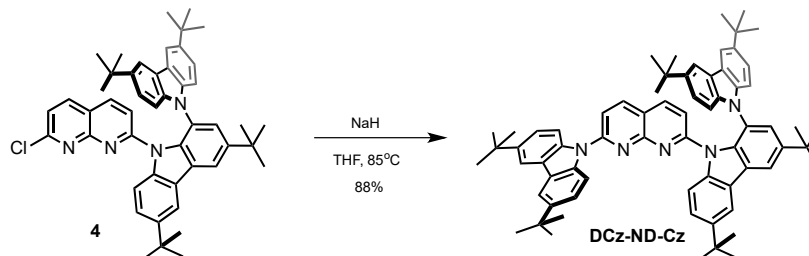

**Compound DCz-ND-Cz.** To a solution of 3,5-di-*tert*-butyl-carbazole (19 mg, 0.068 mmol, 1.4 equiv.) in dry THF (2.5 ml) NaH (4.0 mg, 0.097 mmol, 60% dispersion in mineral oil, 2.0 equiv.) was added at once at room temperature. The reaction mixture was heated at 60°C for 1 h, before adding **4** (35 mg, 0.049 mmol, 1.0 equiv.) in one portion. The vial was screw-capped and heated at 85°C. After 86 h, the mixture was cooled to room temperature, diluted with water and extracted with EtOAc. Purification by column chromatography on silica gel using eluent EtOAc/PE (1:50) afforded 47 mg (88%) of **DCz-ND-Cz** as a light-yellow glass.

**<sup>1</sup>H NMR** (400 MHz, CDCl<sub>3</sub>) δ = 8.21 (d, *J*=1.9, 1H), 8.13 (d, *J*=2.0, 1H), 8.07 – 7.98 (m, 4H), 7.93 (d, *J*=8.7, 1H), 7.68 (d, *J*=14.7, 2H), 7.64 (s, 1H), 7.60 (d, *J*=1.9, 1H), 7.45 (ddd, *J*=8.8, 4.2, 2.0, 3H), 7.24 (s, 2H), 7.09 (s, 2H), 6.67 (d, *J*=8.3, 1H), 6.37 (d, *J*=8.3, 1H), 1.47 – 1.36 (m, 36H), 1.16 (s, 18H)

**<sup>13</sup>C NMR** (101 MHz, CDCl<sub>3</sub>) δ 153.96, 153.82, 153.13, 145.03, 144.73, 142.57, 139.59, 138.45, 137.74, 137.55, 135.42, 133.19, 129.50, 128.00, 125.12, 125.09, 124.66, 124.13, 123.91, 123.55, 122.99, 121.30, 118.11, 117.74, 116.45, 116.24, 115.88, 115.74, 115.24, 112.56, 112.13, 109.48, 34.98, 34.85, 34.80, 34.54, 32.10, 31.99, 31.96, 31.94.

**R<sub>f</sub>** = 0.34 (1/50 EtOAc:PE).

**HRMS** (ESI) calc. for C<sub>68</sub>H<sub>76</sub>N<sub>5</sub> (M+H): 962.6095; Found: 962.6099.

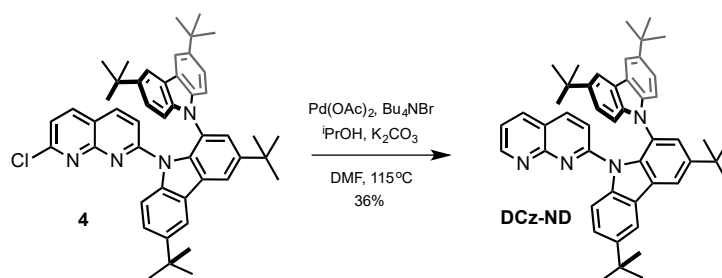

**Compound DCz-ND.** A mixture of K<sub>2</sub>CO<sub>3</sub> (7.8 mg, 0.056 mmol, 1.0 equiv), Pd(OAc)<sub>2</sub> (0.6 mg, 0.0027 mmol, 0.05 equiv), Bu<sub>4</sub>NBr (10 mg, 0.031 mmol, 0.55 equiv) and **4** (40 mg, 0.056 mmol, 1.0 equiv) in dry DMF (2.0 ml) was stirred for few minutes at 115 °C. Isopropanol (8.0 μl) was added and the mixture was remained at the above temperature for 32 h. The mixture was diluted with 1.0 M HCl and extracted with EtOAc. Purification by column chromatography on silica gel using eluent EtOAc/PE (1:4) afforded 14 mg (36%) of **DCz-ND** as a light-yellow glass.

**R<sub>f</sub>** = 0.29 (1/4 EtOAc:PE).

**<sup>1</sup>H NMR** (400 MHz, CDCl<sub>3</sub>) δ = 8.73 (dd, *J*=4.0, 1.9, 1H), 8.25 – 8.08 (m, 2H), 7.81 (d, *J*=8.7, 1H), 7.66 (d, *J*=8.0, 1H), 7.60 (d, *J*=1.7, 1H), 7.53 (s, 2H), 7.41 (dd, *J*=8.7, 1.9, 1H), 7.22 (d, *J*=8.6, 2H), 7.17 – 7.12 (m, 1H), 7.03 (d, *J*=8.5, 2H), 6.72 (d, *J*=8.4, 1H), 6.47 (d, *J*=8.4, 1H), 1.44 (s, 9H), 1.41 (s, 9H), 1.24 (s, 18H).

**<sup>13</sup>C NMR** (101 MHz, CDCl<sub>3</sub>) δ 152.64, 152.35, 145.15, 144.74, 142.44, 139.40, 138.21, 135.99, 135.53, 133.16, 127.95, 124.88, 124.50, 123.97, 123.49, 122.80, 121.54, 120.84, 120.15, 119.16, 116.09, 115.86, 115.04, 111.82, 109.54, 34.96, 34.82, 34.52, 31.98, 31.95, 31.92, 29.70.

**HRMS** (ESI) calc. for C<sub>48</sub>H<sub>53</sub>N<sub>4</sub> (M+H): 658.4265; Found: 658.4263.

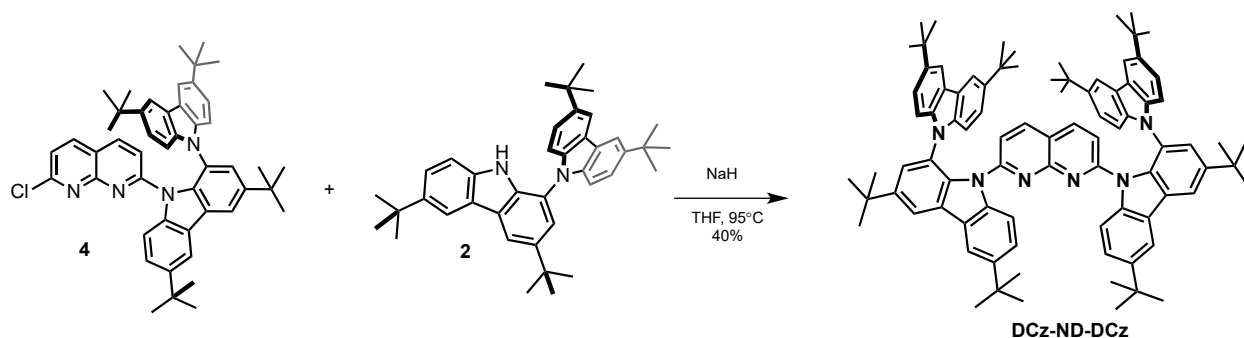

**Compound DCz-ND-DCz.** To a solution of **2** (47 mg, 0.084 mmol, 2.0 equiv) in dry THF ( ), NaH (5.0 mg, 0.13 mmol, 60% dispersion in mineral oil, 3.0 equiv) was added at once. The mixture was stirred at room temperature for 2 h, then **4** (30 mg, 0.042 mmol, 1.0 equiv) was added. The mixture was heated at 90 °C for 48 h, cooled to room temperature, diluted with 1.0 M HCl and extracted with EtOAc. Purification by column chromatography on silica gel using gradient eluent system DCM/PE (1:6 to 2:1) afforded 21 mg (40%) of **DCz-ND-DCz** as a light-yellow glass.

$R_f = 0.55$  (1/10 EtOAc:PE).

**$^1\text{H NMR}$**  (400 MHz,  $\text{CDCl}_3$ )  $\delta = 8.67$  (d,  $J=8.4$ , 2H), 8.18 (dd,  $J=25.8$ , 1.9, 4H), 7.82 (dd,  $J=8.6$ , 5.6, 4H), 7.61 (d,  $J=1.8$ , 5H), 7.47 (dd,  $J=8.7$ , 2.0, 3H), 7.24-7.17 (m, 4H), 7.08 (d,  $J=8.7$ , 4H), 6.83 (d,  $J=8.4$ , 2H), 6.54 (d,  $J=8.3$ , 2H), 1.46 (s, 18H), 1.44 (s, 18H), 1.18 (s, 36H).

**$^{13}\text{C NMR}$**  (101 MHz,  $\text{CDCl}_3$ )  $\delta$  153.54, 152.57, 145.09, 144.70, 142.48, 139.59, 138.29, 136.38, 135.56, 133.23, 127.87, 124.92, 124.52, 123.92, 123.39, 121.49, 120.73, 120.31, 119.43, 116.11, 115.86, 115.28, 111.64, 109.45, 34.97, 34.84, 34.45, 31.97, 31.93, 31.86, 29.70, 29.36, 22.69, 14.12, 1.03.

**HRMS** (ESI) calc. for  $\text{C}_{88}\text{H}_{99}\text{N}_6$  (M+H): 1239.7926; Found: 1239.7926.

Copies of NMR spectra

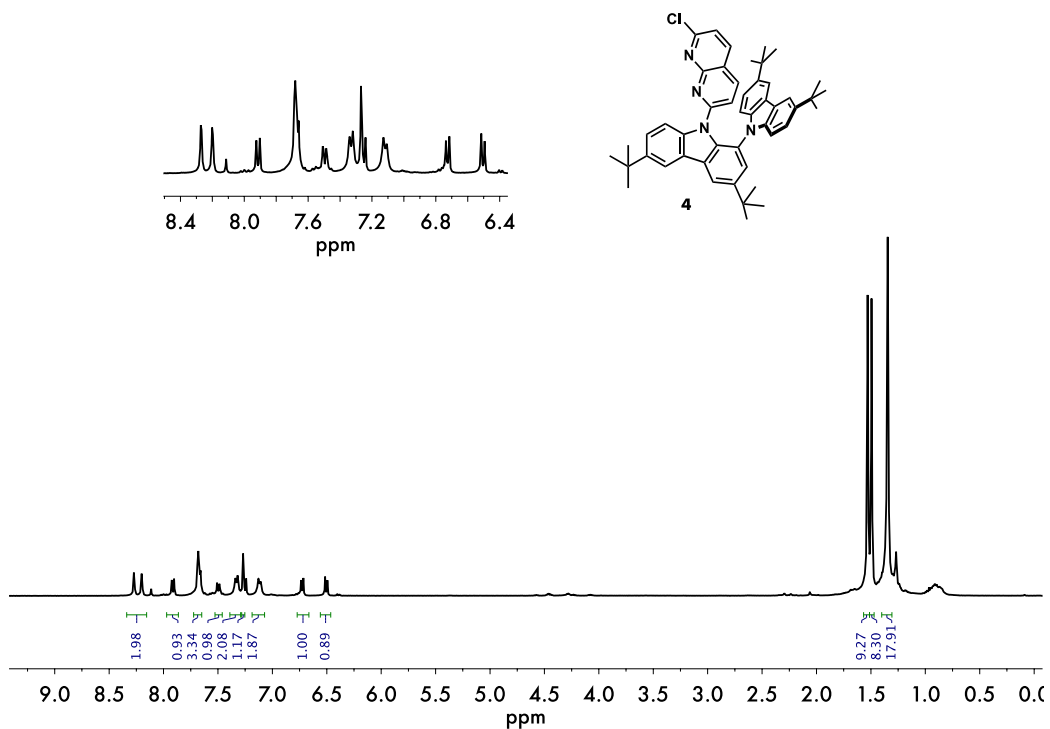

Figure S1. <sup>1</sup>H NMR of 4 (CDCl<sub>3</sub>, 400 MHz).

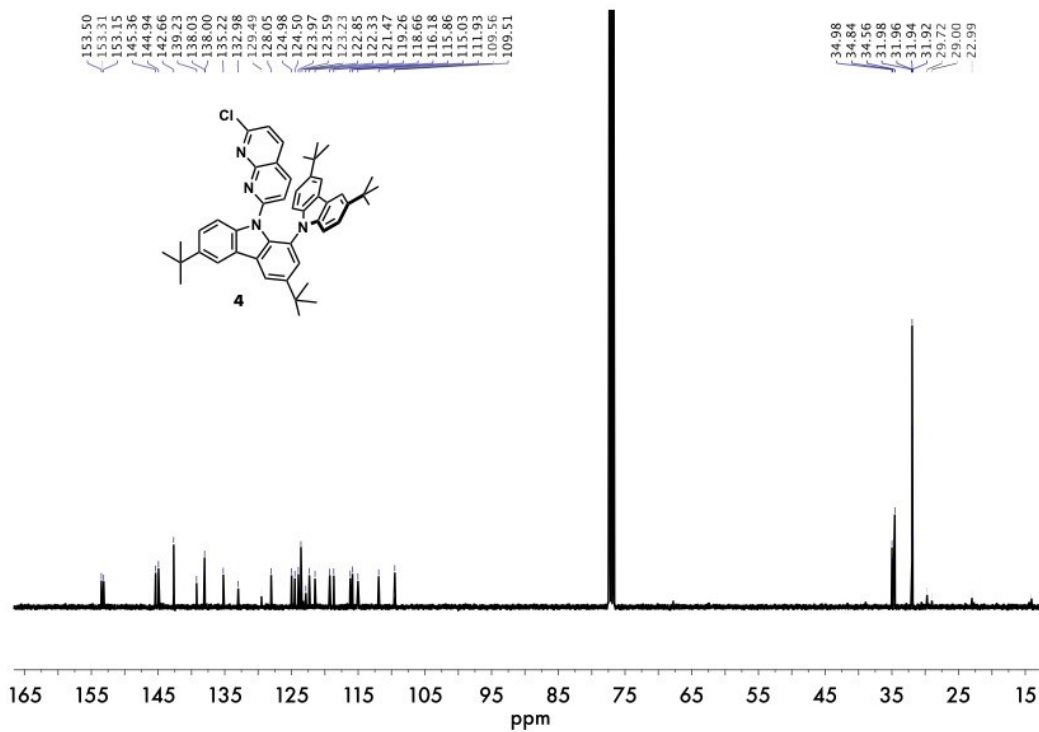

Figure S2. <sup>13</sup>C NMR of 4 (CDCl<sub>3</sub>, 101 MHz).

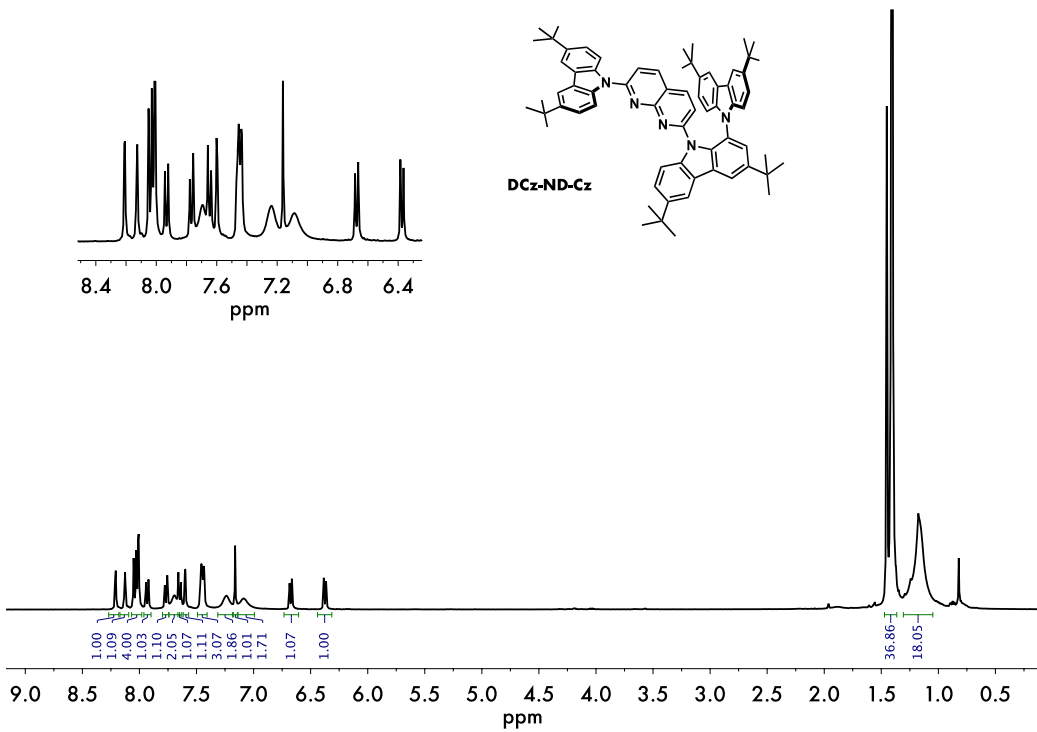

Figure S3.  $^1\text{H}$  NMR of DCz-ND-Cz ( $\text{CDCl}_3$ , 400 MHz).

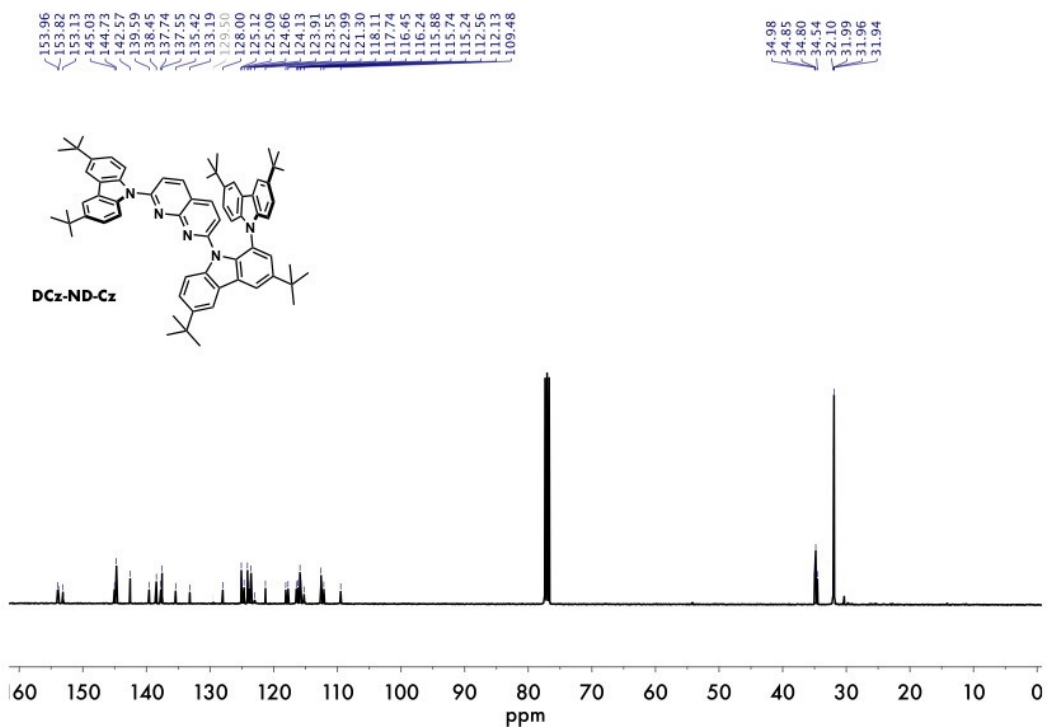

Figure S4.  $^{13}\text{C}$  NMR of DCz-ND-Cz ( $\text{CDCl}_3$ , 101 MHz).

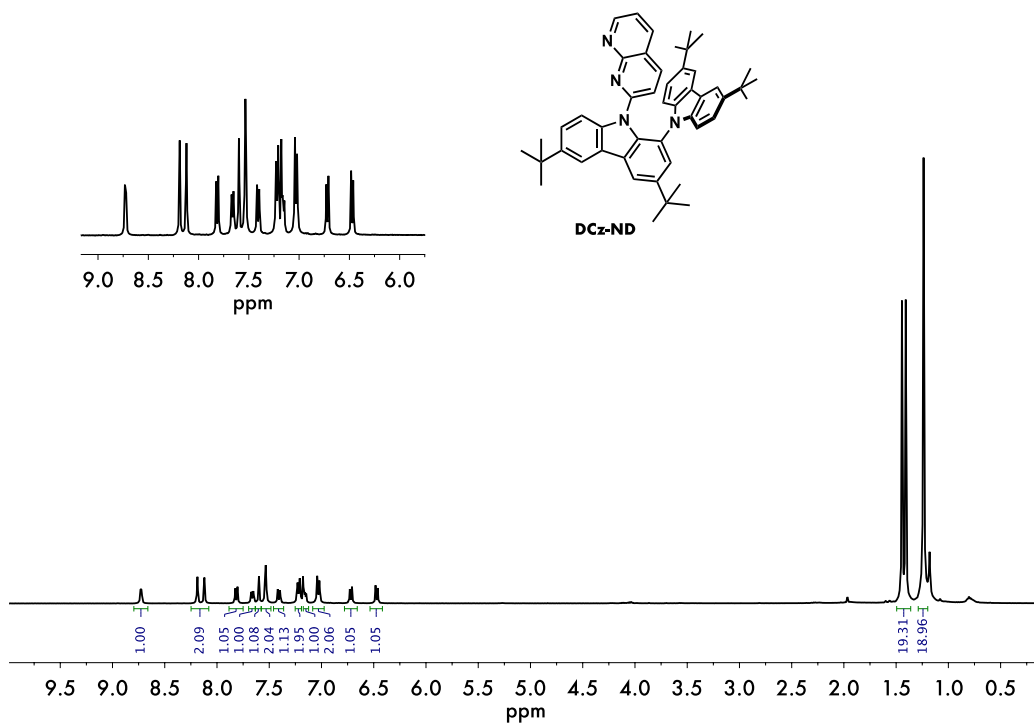

Figure S5. <sup>1</sup>H NMR of DCz-ND (CDCl<sub>3</sub>, 400 MHz).

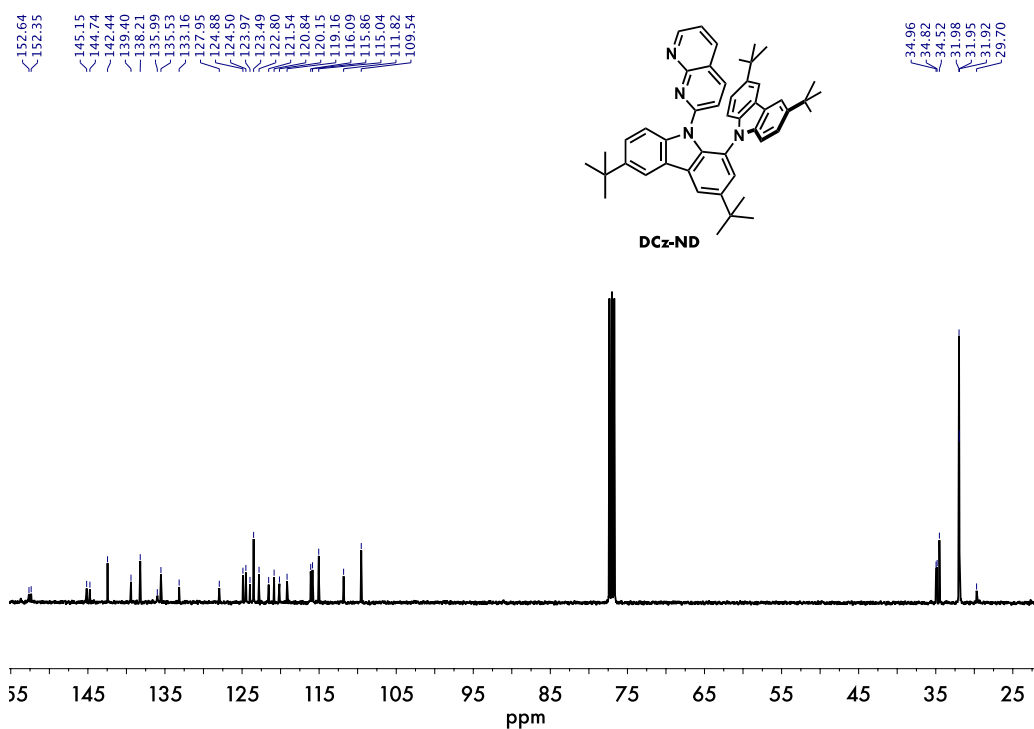

Figure S6. <sup>13</sup>C NMR of DCz-ND (CDCl<sub>3</sub>, 101 MHz).

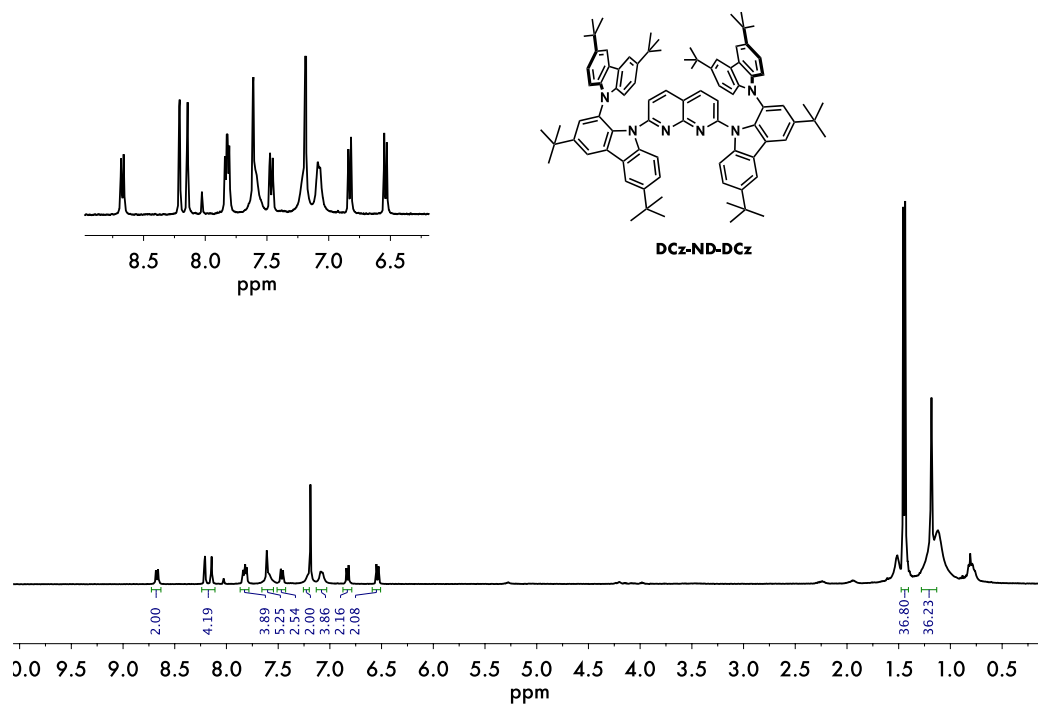

Figure S7.  $^1\text{H}$  NMR of DCz-ND-DCz ( $\text{CDCl}_3$ , 400 MHz).

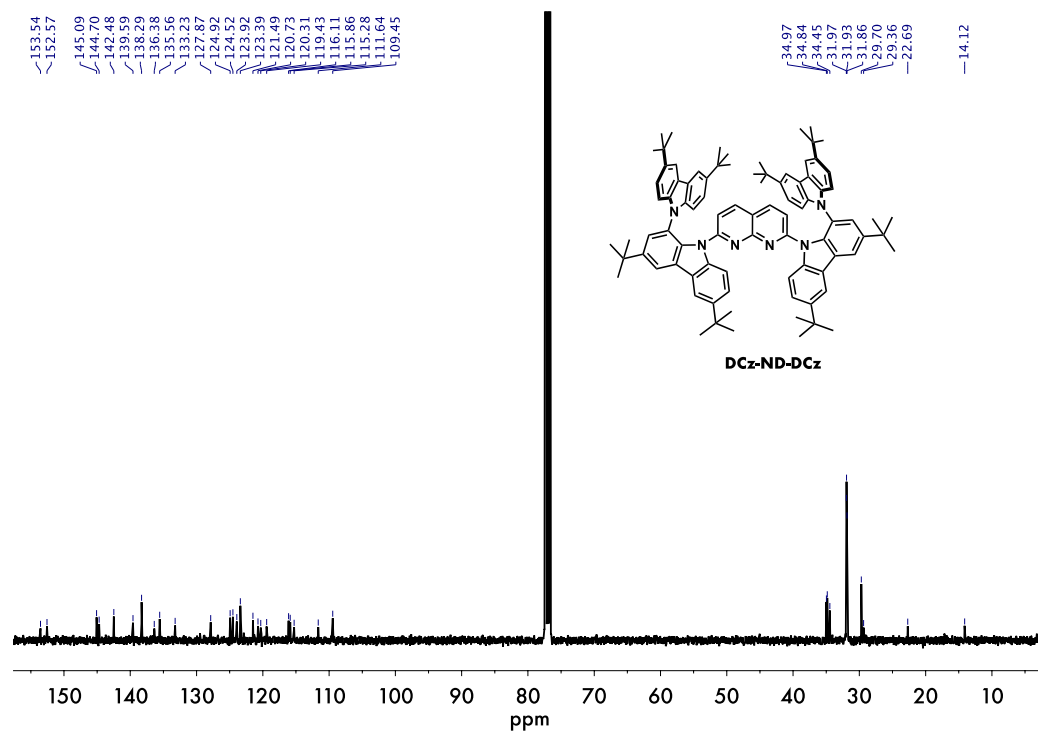

Figure S8.  $^{13}\text{C}$  NMR of DCz-ND-DCz ( $\text{CDCl}_3$ , 101 MHz).



## X-Ray Crystallography

Single crystals of investigated naphthyridines were grown by slow evaporation of solvent/antisolvent mixtures. Suitable crystals were mounted on a microloop (MiTeGen) and analyzed on a XtaLab Synergy diffractometer equipped with HyPix-6000HE hybrid photon counting detector and PhotonJet microfocus X-ray source (CuK $\alpha$ ,  $\lambda = 1.54184$ ). Diffraction experiments were carried out at 100.0 K using Oxford Cryostream 800 cooling system. Data were collected and processed with CrysAlisPro software. The structure was solved by Intrinsic Phasing with the ShelXT [3] program and refined with the ShelXL [4] package using Least Squares minimization as implemented in Olex2 graphical interface [5]. Due to the co-crystallization of highly disordered solvent molecules in **DCz-ND** and **DCz-ND-DCz** crystals, solvent masking was applied during the structure refinement. The structure files **DCz-ND**, **DCz-ND-Cz** and **DCz-ND-DCz** crystals were deposited with the Cambridge Crystallographic Data Centre and can be accessed free of charge (CCDC deposition numbers: **2113723**, **2113744** and **2113780**, respectively).

**Table S1.** Crystallographic data of naphthyridine derivatives.

| Compound                                    | <b>DCz-ND</b>                                        | <b>DCz-ND-Cz</b>                                     | <b>DCz-ND-DCz</b>                                    |
|---------------------------------------------|------------------------------------------------------|------------------------------------------------------|------------------------------------------------------|
| CCDC deposition number                      | <b>2113723</b>                                       | <b>2113744</b>                                       | <b>2113780</b>                                       |
| Empirical formula                           | C <sub>48</sub> H <sub>52</sub> N <sub>4</sub>       | C <sub>68</sub> H <sub>75</sub> N <sub>5</sub>       | C <sub>88</sub> H <sub>98</sub> N <sub>6</sub>       |
| Formula weight                              | 684.93                                               | 962.33                                               | 1239.72                                              |
| Temperature/K                               | 100.00(10)                                           | 100.00(10)                                           | 100.00(10)                                           |
| Crystal system                              | monoclinic                                           | triclinic                                            | monoclinic                                           |
| Space group                                 | P2 <sub>1</sub>                                      | P-1                                                  | P2 <sub>1</sub> /c                                   |
| a/Å                                         | 12.72429(16)                                         | 12.69725(17)                                         | 24.3736(3)                                           |
| b/Å                                         | 24.1867(2)                                           | 17.0233(3)                                           | 22.3138(3)                                           |
| c/Å                                         | 14.22098(19)                                         | 28.0493(4)                                           | 31.3310(5)                                           |
| $\alpha$ /°                                 | 90                                                   | 76.7216(12)                                          | 90                                                   |
| $\beta$ /°                                  | 108.7464(14)                                         | 81.3818(12)                                          | 97.1858(11)                                          |
| $\gamma$ /°                                 | 90                                                   | 78.1997(12)                                          | 90                                                   |
| Volume/Å <sup>3</sup>                       | 4144.45(9)                                           | 5742.26(15)                                          | 16906.1(4)                                           |
| Z                                           | 4                                                    | 4                                                    | 8                                                    |
| $\rho_{\text{calc}}$ /mg/mm <sup>3</sup>    | 1.098 + solvent                                      | 1.113                                                | 0.974 + solvent                                      |
| Crystal size/mm <sup>3</sup>                | 0.171 × 0.083 × 0.03                                 | 0.231 × 0.057 × 0.043                                | 0.18 × 0.07 × 0.033                                  |
| 2 $\theta$ range for data collection        | 6.564 to 153.65°                                     | 5.42 to 155.04°                                      | 4.874 to 155.388°                                    |
| Index ranges                                | -14 ≤ h ≤ 15, -29 ≤ k ≤ 30, -17 ≤ l ≤ 17             | -15 ≤ h ≤ 16, -21 ≤ k ≤ 21, -33 ≤ l ≤ 34             | -28 ≤ h ≤ 30, -27 ≤ k ≤ 27, -39 ≤ l ≤ 39             |
| Reflections collected                       | 56243                                                | 87555                                                | 110834                                               |
| Independent reflections                     | 16763[R(int) = 0.0351]                               | 23628[R(int) = 0.0316]                               | 34596[R(int) = 0.0485]                               |
| Data/restraints/parameters                  | 16763/1/962                                          | 23628/0/1382                                         | 34596/6/1914                                         |
| Goodness-of-fit on F <sup>2</sup>           | 1.030                                                | 1.037                                                | 1.027                                                |
| Final R indexes [ $I \geq 2\sigma(I)$ ]     | R <sub>1</sub> = 0.0511,<br>wR <sub>2</sub> = 0.1316 | R <sub>1</sub> = 0.0512,<br>wR <sub>2</sub> = 0.1309 | R <sub>1</sub> = 0.0630,<br>wR <sub>2</sub> = 0.1535 |
| Final R indexes [all data]                  | R <sub>1</sub> = 0.0530,<br>wR <sub>2</sub> = 0.1330 | R <sub>1</sub> = 0.0603,<br>wR <sub>2</sub> = 0.1368 | R <sub>1</sub> = 0.0906,<br>wR <sub>2</sub> = 0.1670 |
| Largest diff. peak/hole / e Å <sup>-3</sup> | 0.56/-0.26                                           | 0.69/-0.31                                           | 0.72/-0.34                                           |
| Solvents used                               | DCM/Methanol                                         | IPA/DMSO                                             | IPA/DMF                                              |

## Solvatochromism studies

Solvent dependent spectral shifts were analyzed in terms of the Lippert equation,

$$\Delta\nu = \nu_{abs} - \nu_{fl} = \frac{2(\mu_e - \mu_g)^2}{hca^3} * \Delta f + const.$$

Here  $\nu_{abs} - \nu_{fl}$  is the Stokes' shift in wavenumbers determined from absorption and fluorescence spectra;  $\mu_e$  and  $\mu_g$  are dipole moments of the ground and excited states;  $h$  is a Planck constant;  $c$  – velocity of light;  $a$  – cavity radius in which a fluorophore resides.

Solvent orientation polarizability ( $\Delta f$ ) is described by refractive index ( $n$ ) and static dielectric constant ( $\epsilon$ ).

$$\Delta f = \frac{\epsilon - 1}{2\epsilon + 1} - \frac{n^2 - 1}{2n^2 + 1}.$$

Absorption and fluorescence spectra of naphthyridines in different solvents (Fig. S9) were used to obtain Lippert-Mataga plots (Fig. S10). The increase of dipole moments ( $\mu_e - \mu_g$ ) in the excited state compared to the ground state for **DCz-ND**, **DCz-ND-Cz** and **DCz-ND-DCz** was estimated to be 40.6 D, 53.0 D and 58.1 D, respectively. However, different dynamics of the Stokes shifts with increasing solvent orientation polarizability ( $\Delta f$ ) can be determined by different excited state relaxation mechanisms in different compounds as well as by other effects. E.g., unlike the other two compounds, **DCz-ND-Cz** demonstrates a blue shift of absorption spectrum with increasing  $\Delta f$  likely associated with ground state geometry changes. **DCz-ND-DCz**, which has the most heavily shielded naphthyridine acceptor (by the bulky donor groups) exhibits weaker solvation of the excited state. Thus, in fact, the data obtained from Lippert-Mataga plots are not well suited to directly compare the compounds and disclose the effect of asymmetric donor motif. Nonetheless, these studies revealed that **DCz-ND-Cz** displays well-structured FL spectrum in non-polar cyclohexane solvent, which gradually transforms to broad and structureless ICT-like FL spectrum with increasing solvent polarizability. We believe that the latter results provide a support for the existence of close lying CT and LE states ensuring high RISC rate in asymmetric **DCz-ND-Cz** compound.

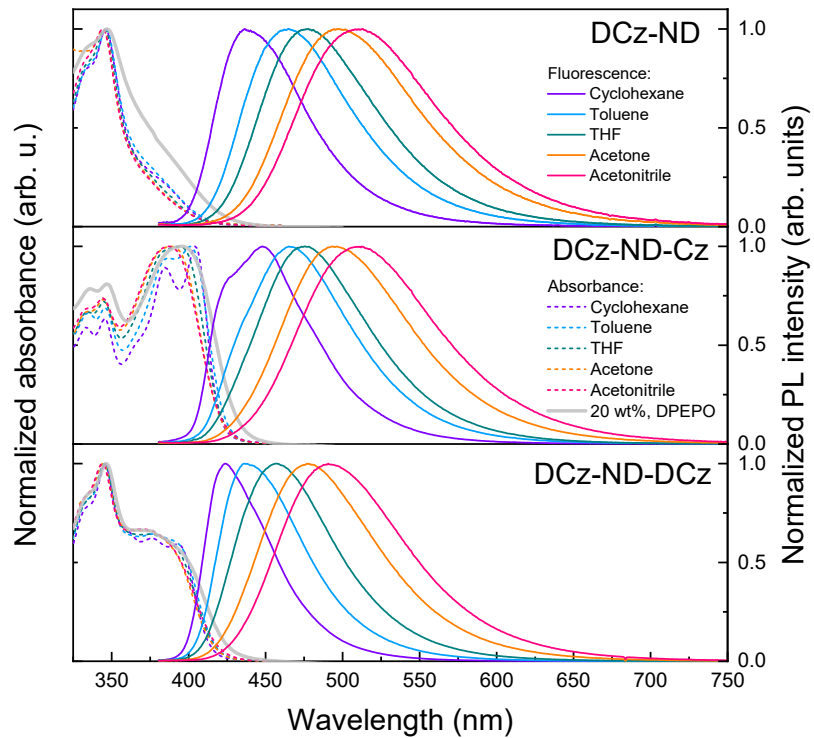

**Figure S9.** Absorption and fluorescence spectra of the studied naphthyridine derivatives in different solvents. Absorption spectra of the compounds in DPEPO host are shown for reference.

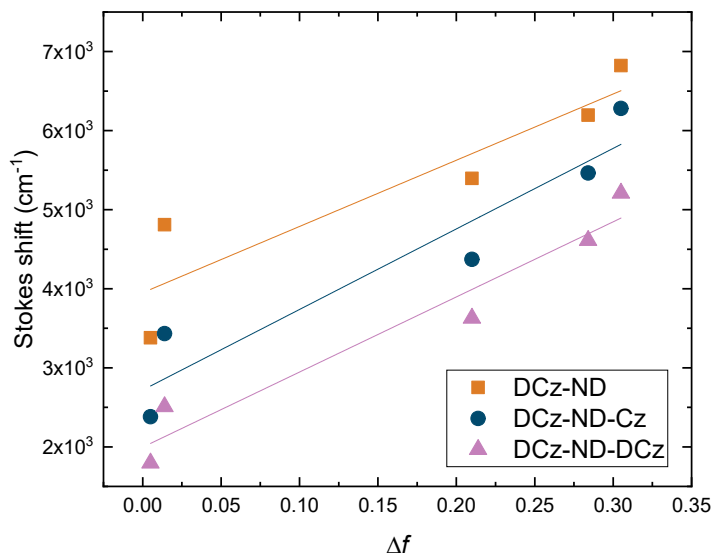

**Figure S10.** Lippert-Mataga plots of the studied naphthyridine derivatives in different solvents showing the variation of Stokes shift as a function of solvent orientation polarizability.

## References

- [1] A.W. Jones, C.K. Rank, Y. Becker, C. Malchau, I. Funes-Ardoiz, F. Maseras, F.W. Patureau, Accelerated Ru–Cu Trinuclear Cooperative C–H Bond Functionalization of Carbazoles: A Kinetic and Computational Investigation, *Chem. – A Eur. J.* 24 (2018) 15178–15184. <https://doi.org/10.1002/CHEM.201802886>.
- [2] G.R. Newkome, S.J. Garbis, V.K. Majestic, F.R. Fronczek, G. Chiarilc, Chemistry of Heterocyclic Compounds. 61. Synthesis and Conformational Studies of Macrocycles Possessing 1,8- or 1,5-Naphthyridino Subunits Connected by Carbon-Oxygen Bridges, *J. Org. Chem.* 46 (1981) 833–839. <https://doi.org/10.1021/jo00318a001>.
- [3] G.M. Sheldrick, SHELXT - Integrated space-group and crystal-structure determination, *Acta Crystallogr. Sect. A Found. Crystallogr.* 71 (2015) 3–8. <https://doi.org/10.1107/S2053273314026370>.
- [4] G.M. Sheldrick, Crystal structure refinement with SHELXL, *Acta Crystallogr. Sect. C Struct. Chem.* 71 (2015) 3–8. <https://doi.org/10.1107/S2053229614024218>.
- [5] O. V. Dolomanov, L.J. Bourhis, R.J. Gildea, J.A.K. Howard, H. Puschmann, *OLEX2* : a complete structure solution, refinement and analysis program, *J. Appl. Crystallogr.* 42 (2009) 339–341. <https://doi.org/10.1107/S0021889808042726>.
